# Supplementary material for: Equity in the use of public services for mother and newborn child health care in Pakistan: a utilization incidence analysis
Source: PubMed Central journal article supplement (PMC4962481; doi:10.1186/s12939-016-0405-x), 2016-07-26

## Appendix A

### Appendix A: Concentration Curves and Lorenz Curves for the Utilization of MNCH related Public Services in Pakistan

Figure 1: Utilization of Pre-Natal Consultation in Pakistan (2010-11)

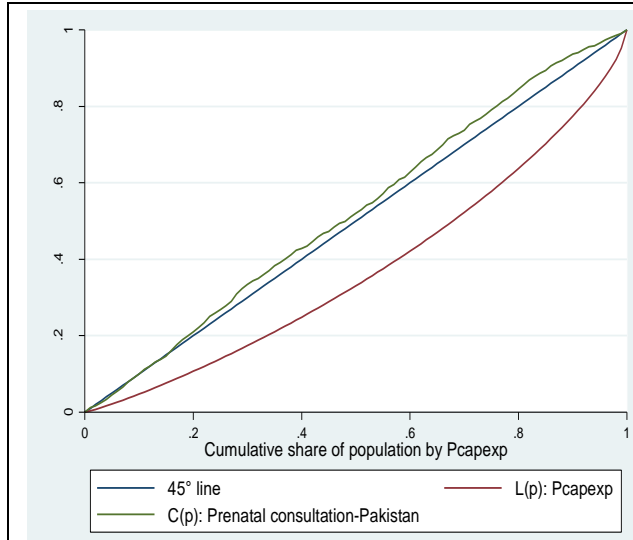

**Figure 2: Utilization of Prenatal Consultation in Provinces (2010-11)**

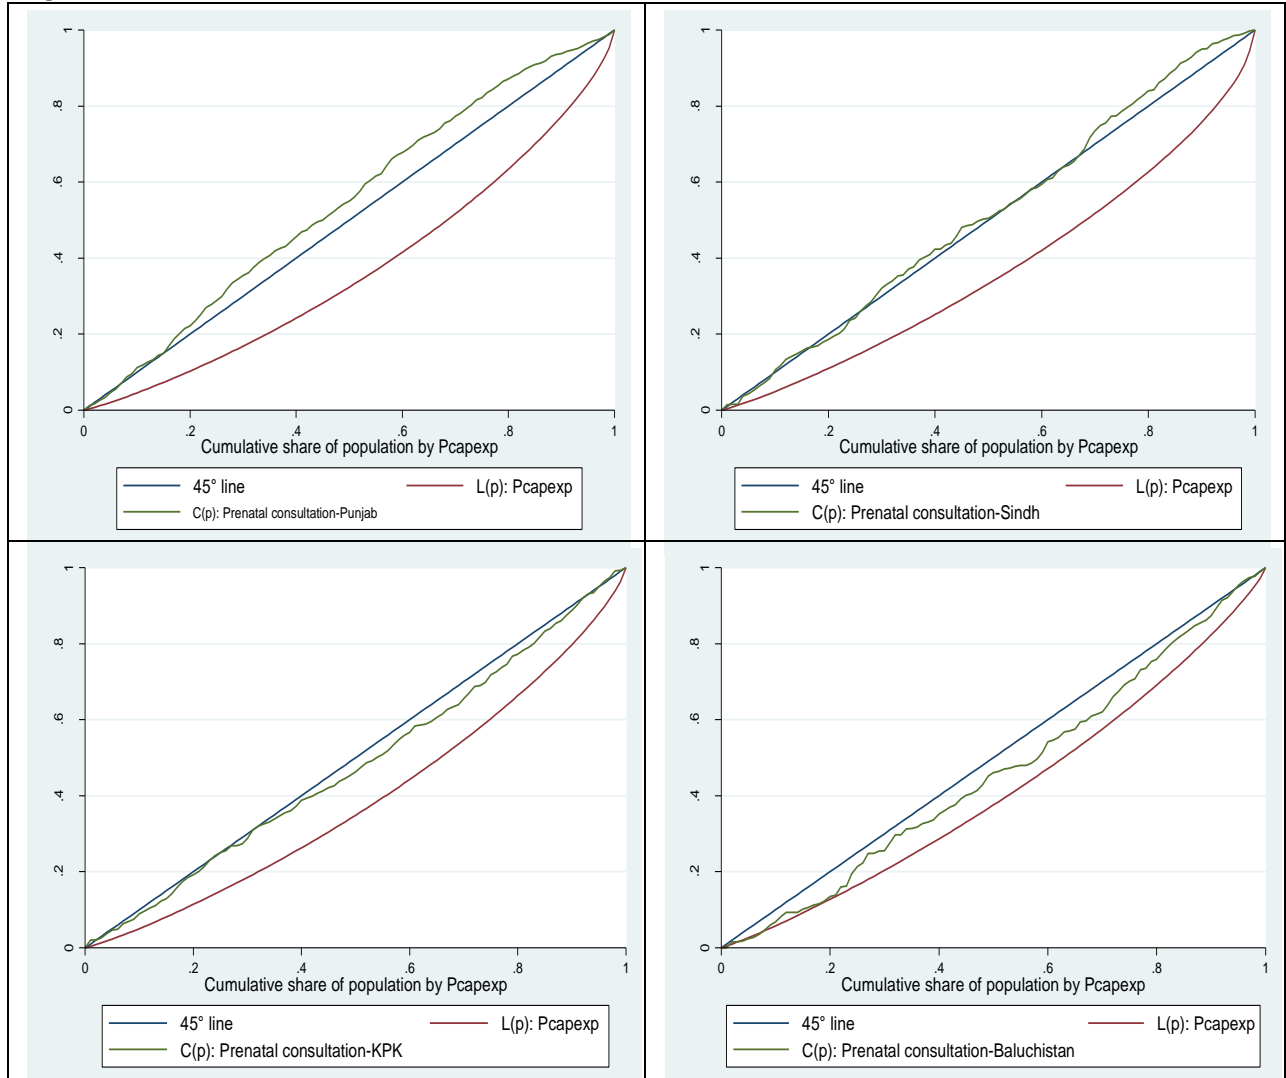

Figure 3: Utilization of Post-Natal Consultation in Pakistan (2010-11)

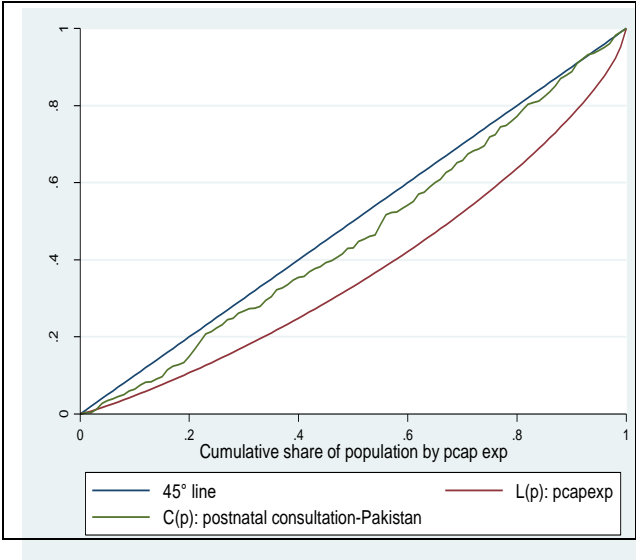

**Figure 4: Utilization of Postnatal Consultation in Provinces (2010-11)**

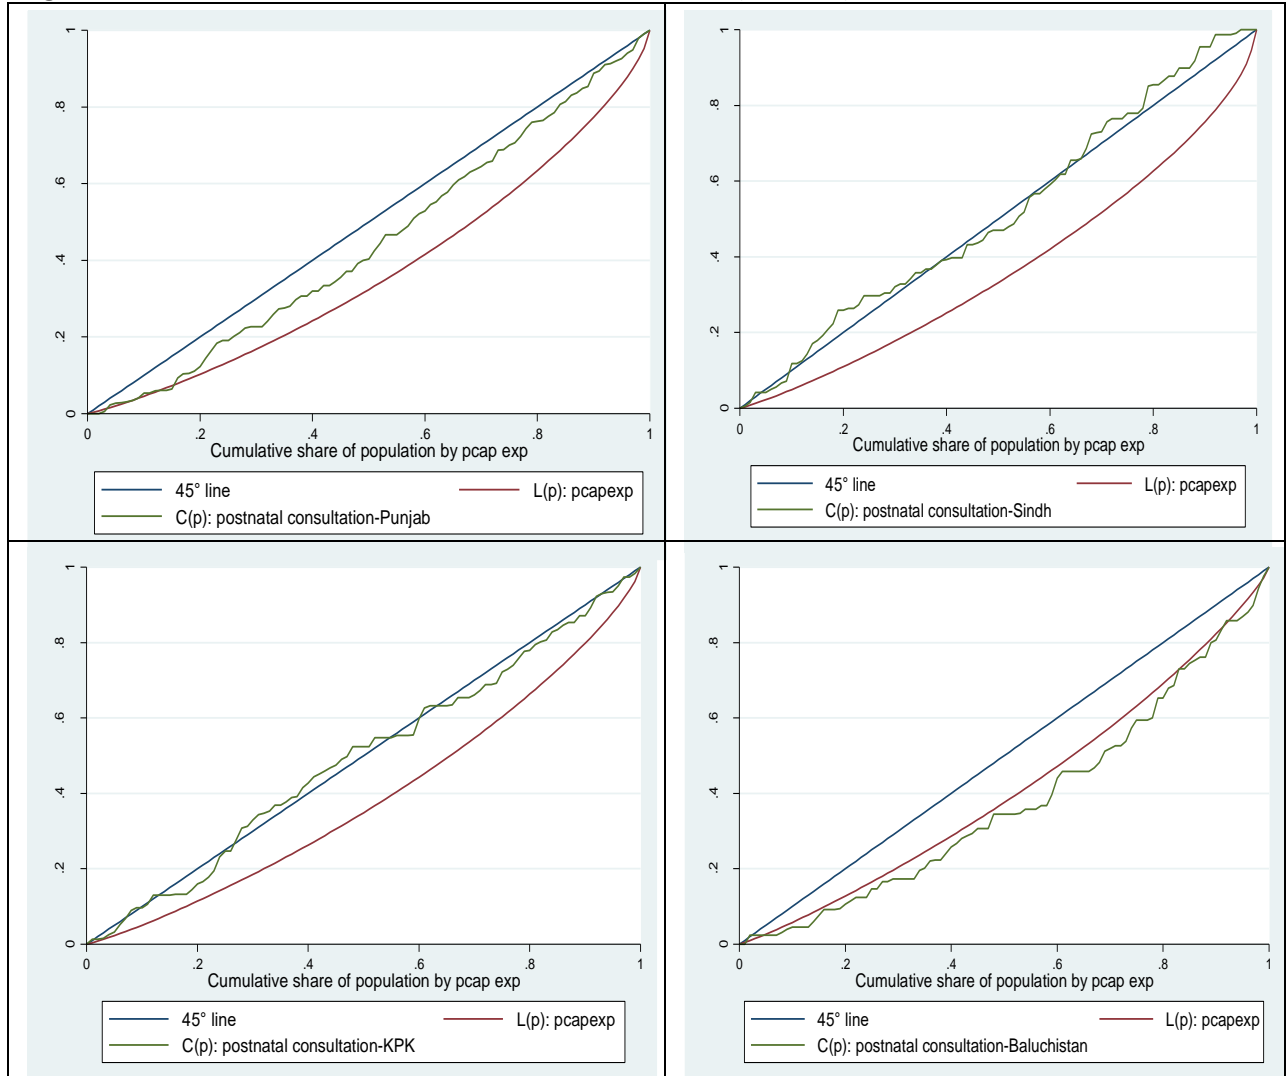

Figure 5: Utilization of Hospital based Maternal Delivery Services in Pakistan (2010-11)

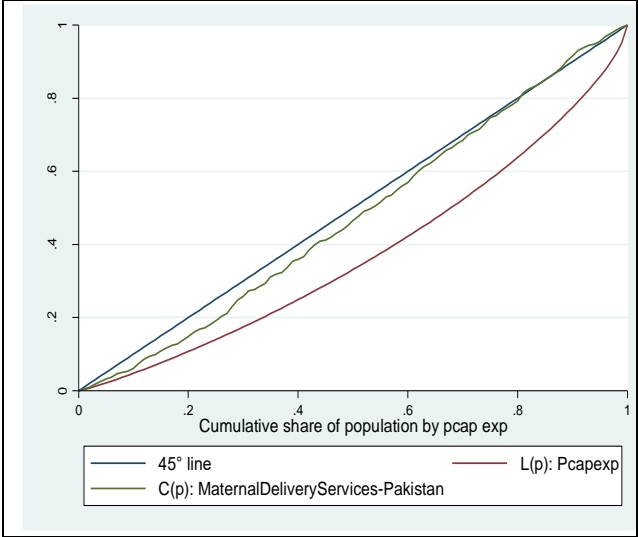

**Figure 6: Utilization of Hospital based Maternal Delivery Services in Provinces (2010-11)**

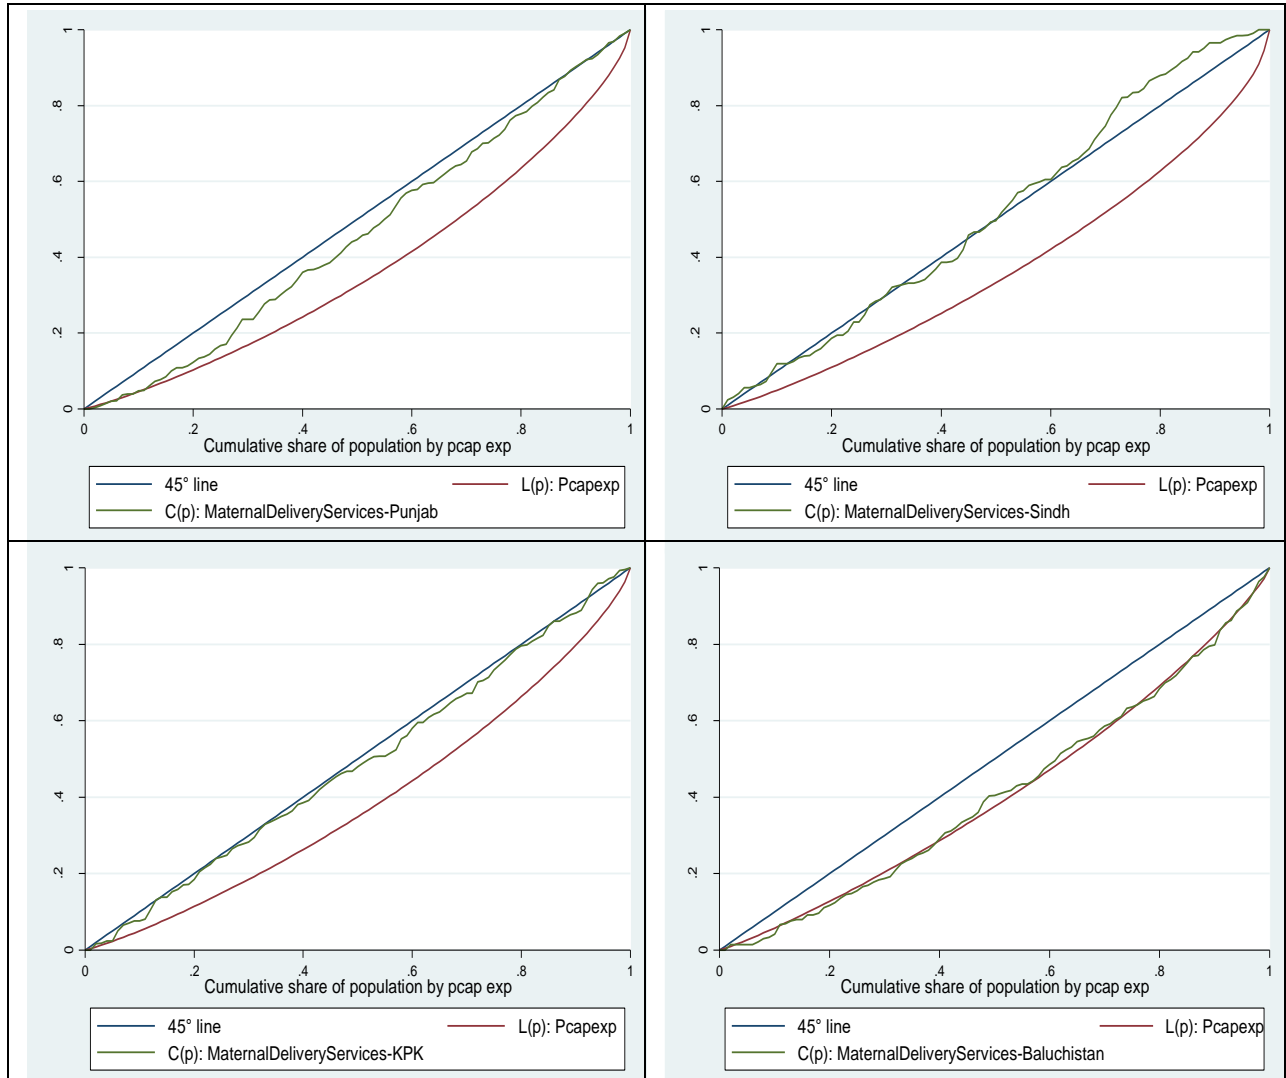

**Figure 7: Utilization Incidence of Tetanus Injection in Pakistan (2010-11)**

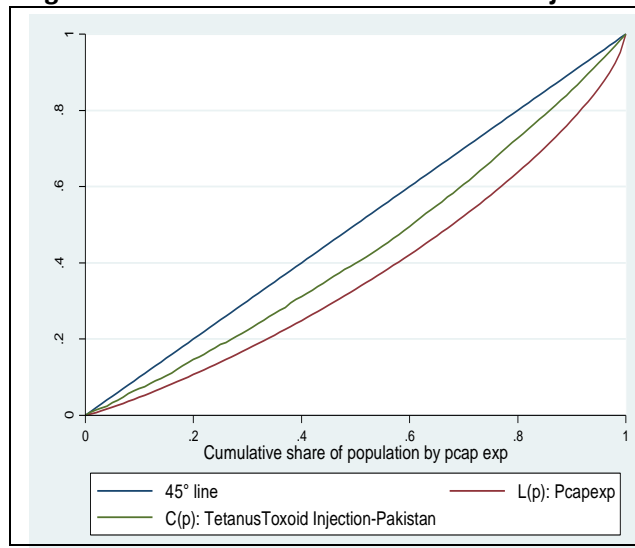

**Figure 8: Utilization of Tetanus Toxoid Utilization in Provinces (2010-11)**

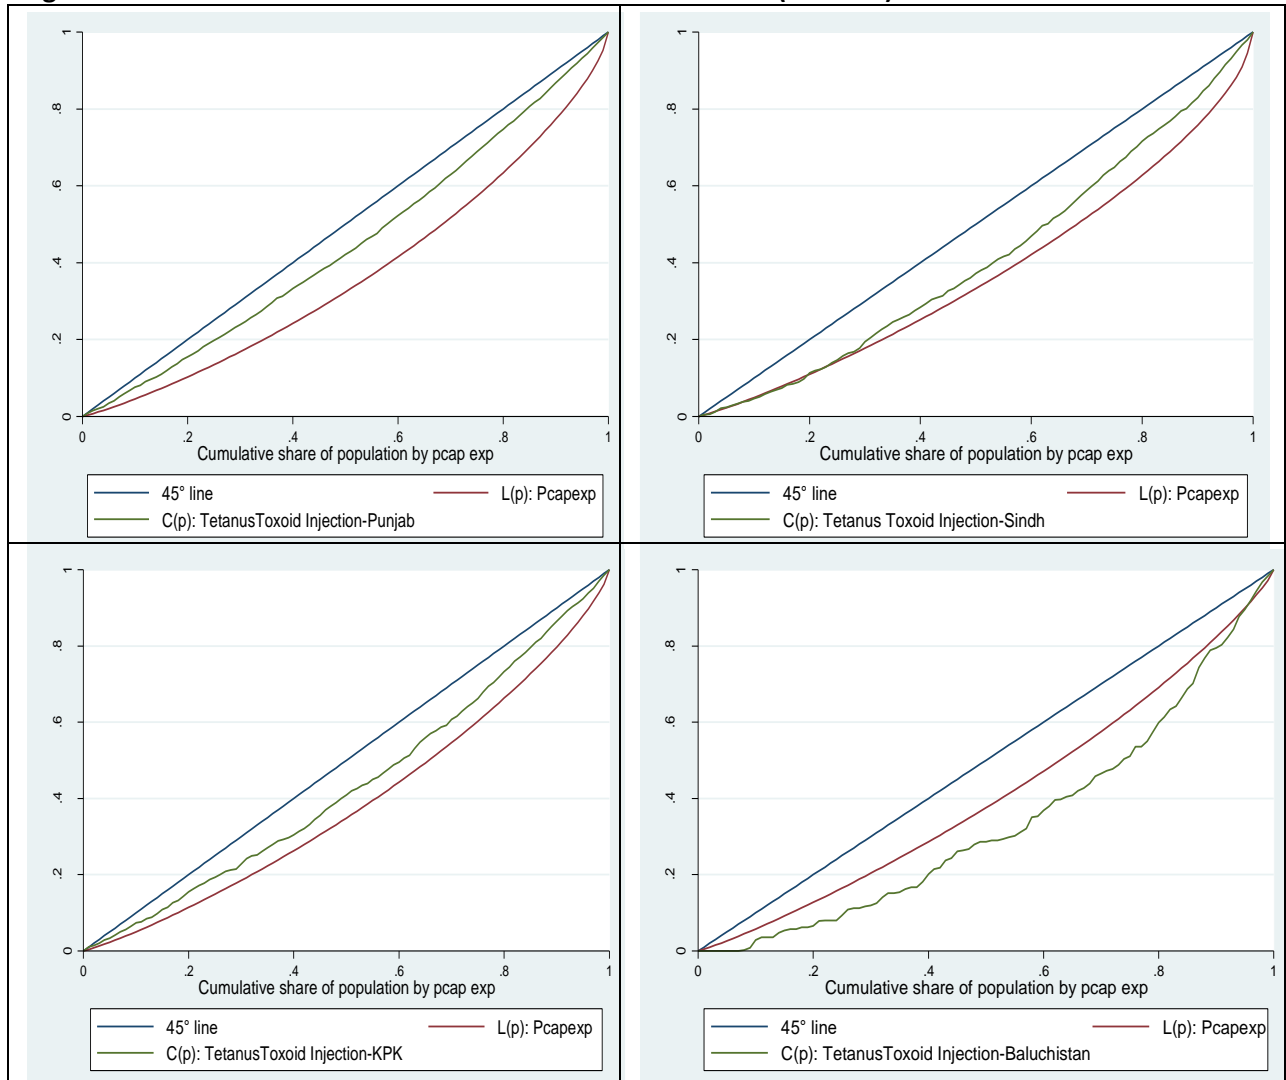



Figure 9: Utilization Incidence of Immunization in Provinces (2010-11)

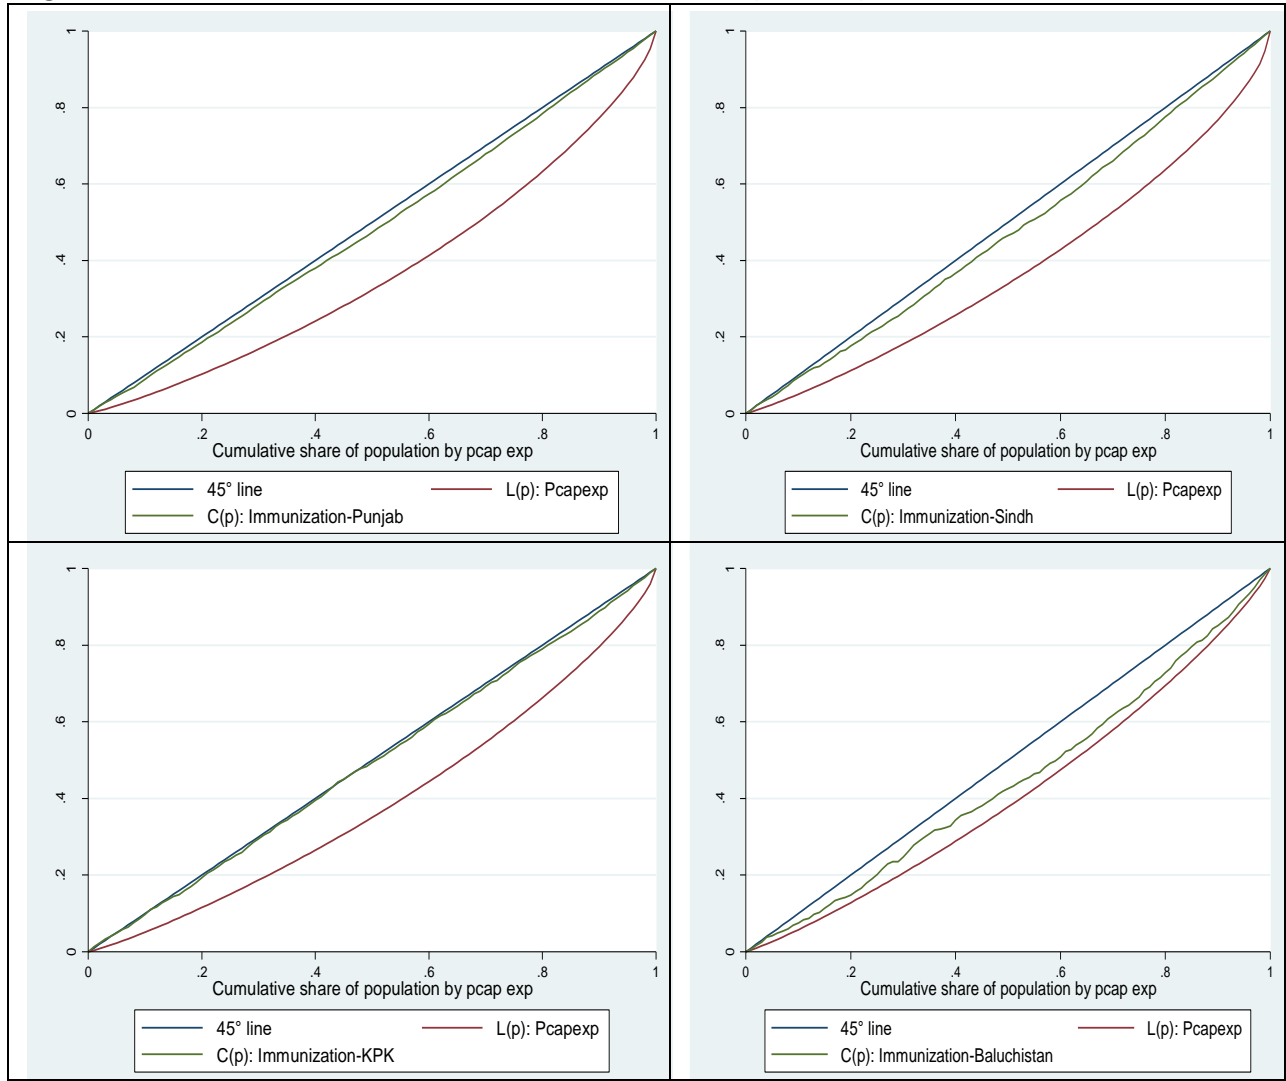

Figure 10: The Utilization Incidence of BHUs across Provinces in Pakistan

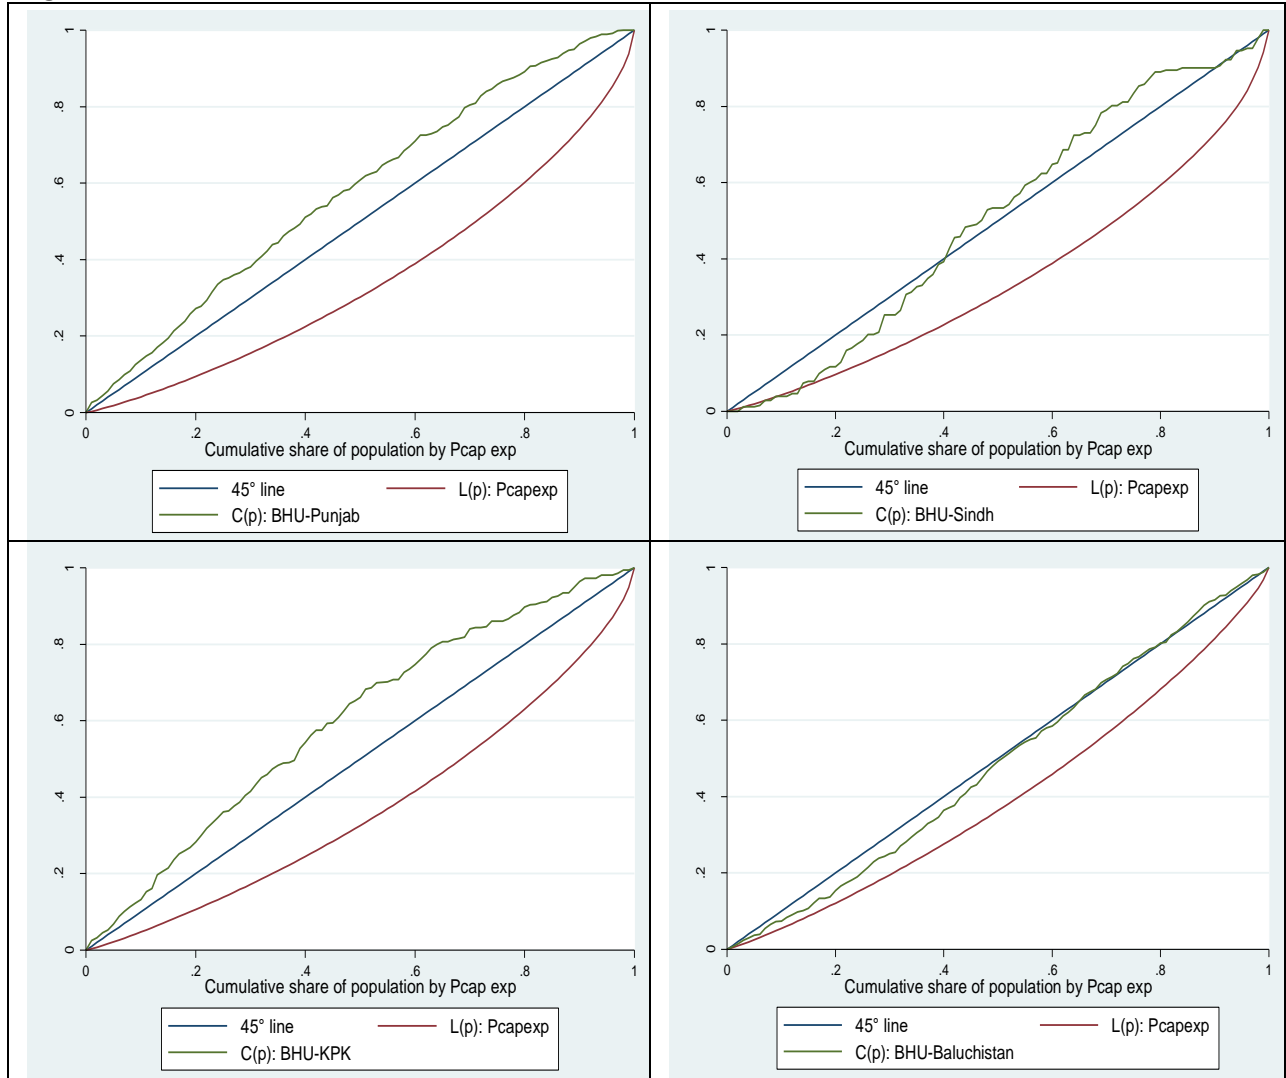

**Figure 11: Utilization Incidence of Family Planning Services in Pakistan (2010-11)**

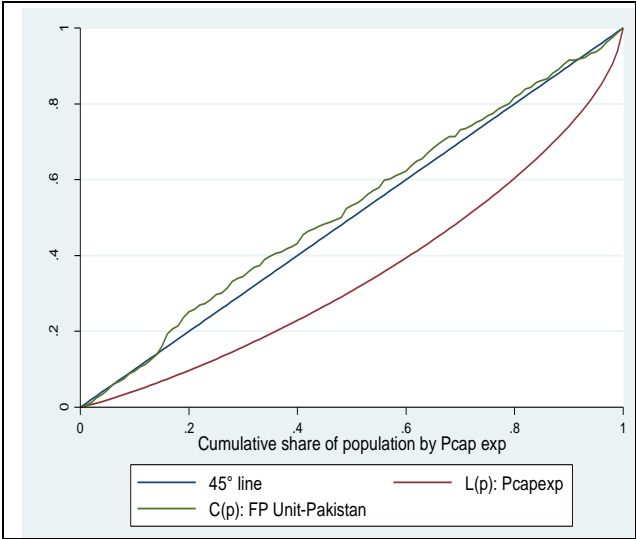

**Figure 12: Utilization Incidence of Family Planning Services in Provinces (2010-11)**

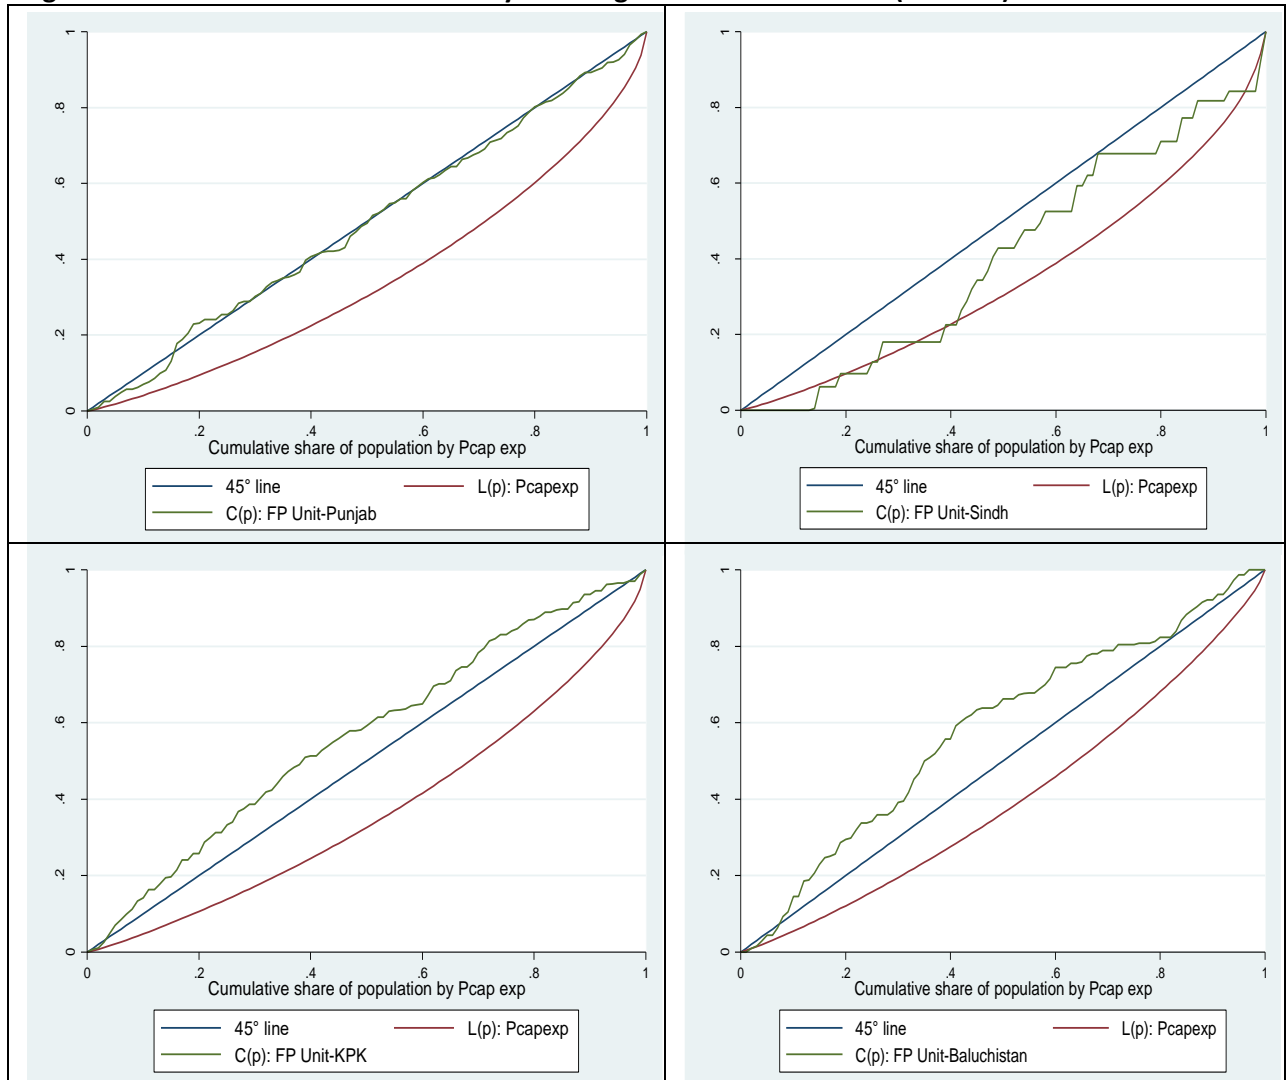

Supplement: 12939_2016_405_MOESM1_ESM.pdf [file 12939_2016_405_MOESM1_ESM.pdf]
